# Supplementary material
Source: PubMed Central journal article supplement (PMC4675148)
Supplement: NIHMS741837-supplement-1.pdf [file NIHMS741837-supplement-1.pdf]

**Supplemental information for  
Behavior of Water in Collagen and  
Hydroxyapatite Sites of Cortical Bone:  
Fracture, Mechanical Wear, and Load Bearing  
Studies**

Farhana Gul-E-Noor,<sup>†</sup> Chandan Singh,<sup>‡,¶</sup> Antonios Papaioannou,<sup>§</sup> Neeraj  
Sinha,<sup>‡</sup> and Gregory S. Boutis<sup>\*,†,§</sup>

*<sup>†</sup>Department of Physics, Brooklyn College of The City University of New York, Brooklyn, New  
York 11210, United States*

*<sup>‡</sup>Center of Biomedical Research, SGPGIMS Campus, Raibareilly Road, Lucknow 226014, India*

*<sup>¶</sup>School of Biotechnology, Banaras Hindu University, Varanasi 221005 India*

*<sup>§</sup>The Graduate Center of The City University of New York, Department of Physics, New York,  
United States*

E-mail: [gboutis@brooklyn.cuny.edu](mailto:gboutis@brooklyn.cuny.edu)

Phone: +1 718951-5000 x2873

## The complete author list for Reference 11 and 13 which has more than 10 authors

(11) McElderry, J.-D. P.; Zhu, P.; Mroue, K. H.; Xu, J.; Pavan, B.; Fang, M.; Zhao, G.; McNerny, E.; Kohn, D. H.; Franceschi, R. T.; Holl, M. M. B.; Tecklenburg, M. M. J.; Ramamoorthy, A. Morris, M. D. Crystallinity and Compositional Changes in Carbonated Apatites: Evidence from  $^{31}\text{P}$  Solid-State NMR, Raman, and AFM Analysis. *J. Solid. State. Chem.* **2013**, *206*, 192–198.

(13) Wang, Y.; Von Euw, S.; Fernandes, F. M.; Cassaignon, S.; Selmane, M.; Laurent, G.; Pehau-Arnaudet, G.; Coelho, C.; Bonhomme-Coury, L.; Giraud-Guille, M.-M.; Babonneau, F.; Azais, T.; Nassif, N. Water-Mediated Structuring of Bone Apatite. *Nat. Mater.* **2013**, *12*, 1144–1153.

## Diffusive Attenuation Kernel

The pulse sequence used for the diffusion relaxation measurements is shown in figure S2. The attenuation of the magnetization due to the gradients was derived explicitly for the trapezoidal waveform, which was used in this work, using Mathematica. The spatial wavenumber is given by  $q(t) = \gamma \int_0^t dt g(t)$ , where  $g(t)$  denotes the waveform of the gradient pulse. In the pulse sequence used in this work  $g(t) = ct$  for the rising time interval ( $\tau \rightarrow t_1$ ),  $g(t) = G_m$  for the time interval ( $t_1 \rightarrow t_2$ ) and  $g(t) = -ct$  for the dropping time ( $t_2 \rightarrow \delta$ ) and  $c > 0$ . To be clear, the rise and fall times of the trapezoidal gradient pulse are  $t_1$  and  $\xi \equiv (\delta - t_2)$ , respectively. The attenuation factor is  $-D \int_0^t dt q^2(t)$  and therefore the diffusive attenuation kernel is,

$$\begin{aligned}
\log \frac{M(g, t)}{M_0} = & \frac{\gamma^2}{30} \left[ 20G_m^2 (t_2 + \xi)^2 (9t_1 + 8t_2 + 8\xi + 6(\Delta + \tau)) + \right. \\
& c^2 \left( 41t_1^5 + 15t_1^4 (3\xi + 2(\Delta + \tau) + 3t_2) - \right. \\
& 80\xi^2 t_1^3 - 10\xi^2 t_1^2 (7\xi + 6(\Delta + \tau) + 6t_2) + 45\xi^4 t_1 + \xi^4 (41\xi + 30(\Delta + \tau) + 45t_2) \left. \right) + \\
& 10cG_m \left( 16t_1^3 (\xi + t_2) + 3t_1^2 (\xi + t_2) (5\xi + 4(\Delta + \tau) + 5t_2) - 18\xi^2 t_1 (\xi + t_2) - \right. \\
& \left. \left. \xi^2 (4\xi (4\xi + 3(\Delta + \tau)) + 15t_2^2 + 4t_2 (8\xi + 3(\Delta + \tau))) \right) \right]. \tag{1}
\end{aligned}$$

It should be noted that in eq. 1 the term proportional to  $\Delta$  dominates for long times whereas the linear and non linear terms of  $t_1, t_2, \xi$  become important for short times.

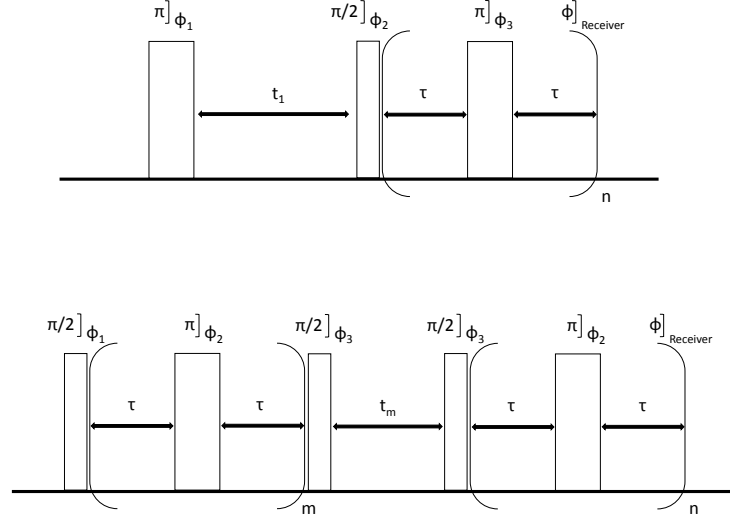

**Figure S1:** The radio frequency pulse sequences used for 2D  $T_1 - T_2$  (top) and 2D  $T_2 - T_2$  (bottom) experiments. The phase cycling used for 2D  $T_1 - T_2$  experiments was,  $\phi_1 = x, y, -x, -y$ ,  $\phi_2 = x, x, -x, -x$ ,  $\phi_3 = y, y, y, y$ , and the receiver phase was  $\phi_{\text{Receiver}} = x, x, -x, -x$ . For 2D  $T_2 - T_2$  experiments the phase cycling used was  $\phi_1 = x, -x, x, -x$ ,  $\phi_2 = y, -y, y, -y$ ,  $\phi_3 = x, x, -x, -x$ , and the receiver phase was  $\phi_{\text{Receiver}} = x, -x, x, -x$

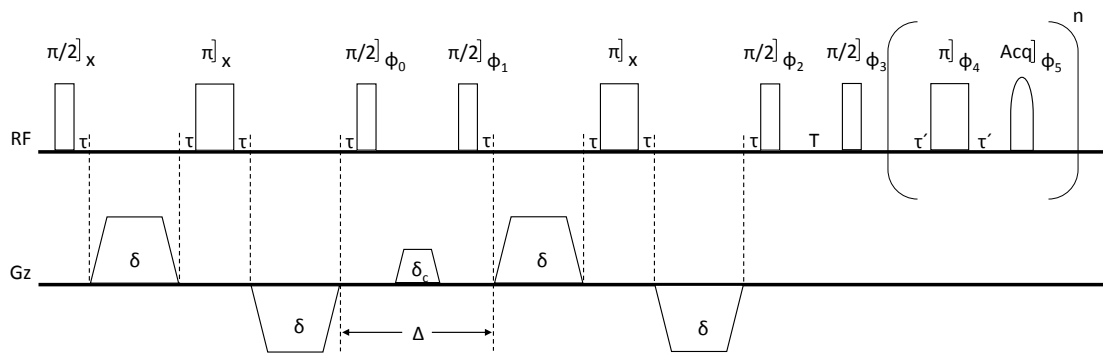

**Figure S2:** 2D diffusion- $T_2$  correlation pulse sequence. The first stage of the experiment makes use of a bipolar gradient stimulated echo pulse sequence introduced by Wu et al.<sup>1</sup> and the second part is a CPMG train. The  $\pi_x$  pulses refocus the background gradients. The use of bipolar gradient pulses compensate for the Eddy currents. In addition, shaped pulses were used to minimize ringdown effects which introduce imperfections in the gradient pulses. The phases  $\phi_0, \phi_1, \phi_2, \phi_3$  and  $\phi_5$  of the RF pulses are given in<sup>1</sup> and an MLEV-16 phase alternating scheme was used for  $\phi_4$ . The kernel that describes the diffusive decay over the entire pulse sequence, given the trapezoidal pulses, is given by eq. 1.

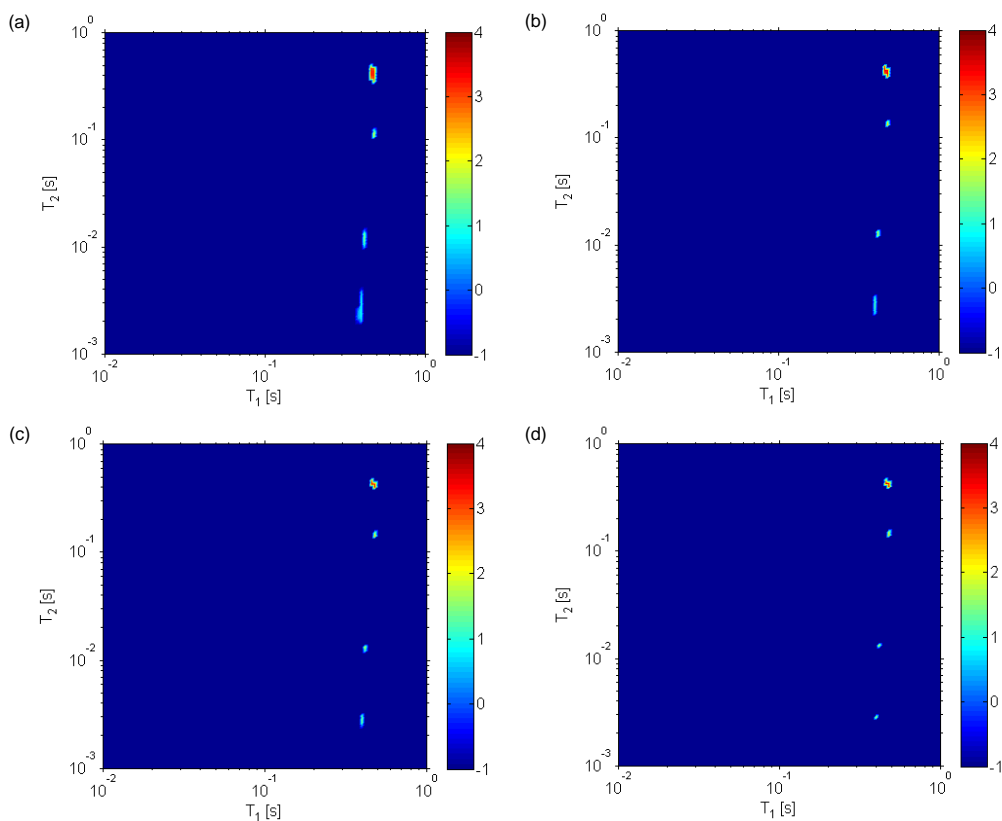

**Figure S3:** 2D ILT map of  $^2\text{H}$   $T_1$ - $T_2$  experiments performed on untreated intact bone at  $22^\circ\text{C}$ , for different values of the regularization parameter  $\alpha$ . In the figure the value of  $\alpha$  was set to a) 0.5, b) 0.05, c) 0.005, and d) 0.0005. The relative signal intensities in the peaks A, B and C (see figure 1 in text) were observed to not vary significantly for the range of  $\alpha$  shown (e.g. in a) the relative intensities of peaks A, B and C are 0.52, 0.30, and 0.018 and in d) the relative intensities are 0.61, 0.22, and 0.17 respectively.) Additionally, the centroid  $T_1$  and  $T_2$  values were also not observed to change significantly in the range of  $\alpha$  shown. The BRD method gave a converged value of  $\alpha$  in all our experiments that was approximately  $10^{-4}$ . In this figure the color bar to the right, denoting signal intensity in arbitrary units, is on a logarithmic scale.

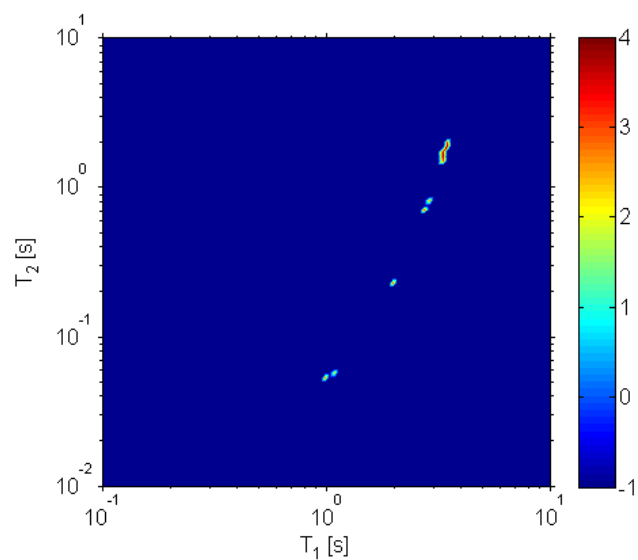

**Figure S4:** 2D ILT map of  $^1\text{H}$   $T_1$ - $T_2$  experiments performed on untreated intact bone at  $22^\circ\text{C}$ . The experiment used a different values of  $\tau$  and  $t_1$  to measure the relaxation times  $T_1$  and  $T_2$ . Similar to the  $^2\text{H}$   $T_1$ - $T_2$  experiments (figure 1a in the text), we observe 4 different reservoirs characterized by water experiencing different dynamical characteristics. In this figure the color bar to the right, denoting signal intensity in arbitrary units, is on a logarithmic scale.

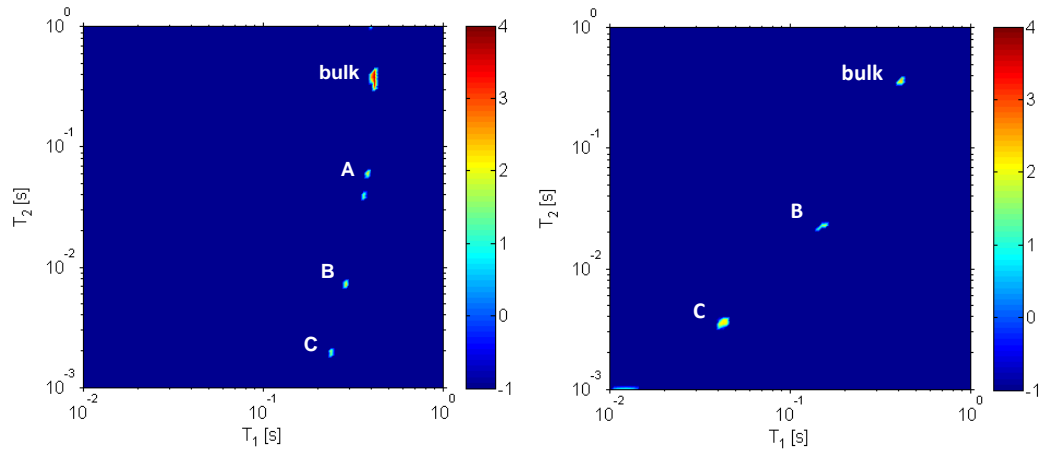

**Figure S5:** 2D ILT map of  $^2\text{H}$   $T_1$ - $T_2$  experiments performed on untreated intact bone at 22°C. The left ILT map was obtained after immersing the bone sample in  $\text{D}_2\text{O}$  and the right ILT map was obtained after removal of  $\text{D}_2\text{O}$  from the NMR tube. These data reveal that peak A vanishes when bulk  $\text{D}_2\text{O}$  is removed providing evidence that this is peak arises from surface water on the bone samples. The values of the  $T_1$  and  $T_2$  relaxation times appear to change upon removal of the bulk water, as discussed in the text, and is likely evidence of exchange beyond what is probed in our  $T_2$ - $T_2$  experiments (up to 10 ms). In this figure the color bar to the right, denoting signal intensity in arbitrary units, is on a logarithmic scale.

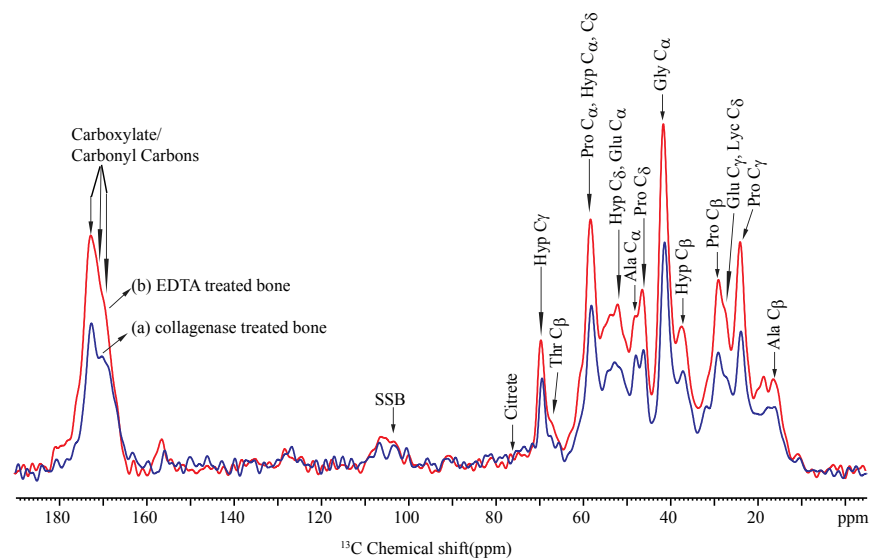

**Figure S6:**  $^{13}\text{C}$  MAS NMR spectra of a) collagenase treated and b) EDTA treated bone sample recorded at 10 kHz magic angle spinning speed.

## References

- (1) Wu, D.; Chen, A.; Johnson, C. S. An Improved Diffusion-Ordered Spectroscopy Experiment Incorporating Bipolar-Gradient Pulses. *J. Magn. Reson. Series A* **1995**, *115*, 260–264.
